# Supplementary material for: Analysis of Social Media Perceptions Among Orthopaedic Surgery Residency Applicants and Social Media Use by Residency Programs During the 2020 to 2021 Cycle
Source: PubMed Central journal article supplement — JB JS Open Access. 2021 Dec 21;6(4):e21.00083. doi: 10.2106/JBJS.OA.21.00083 (PMC8691490; doi:10.2106/jbjs.oa.21.00083), 2021-12-21
Supplement: jbjsoa-6-e21.00083-s001.pdf [file jbjsoa-6-e21.00083-s001.pdf]

# Social Media Use by Orthopaedic Surgery Applicants and Programs

1. Do you have social media?

*Mark only one oval.*

- Yes
- No
- Prefer not to answer

2. How many social media platforms do you use?

*Mark only one oval.*

- 1
- 2
- 3
- 4
- 0
- Prefer not to answer

3. What is your most commonly used form of social media?

*Mark only one oval.*

- Facebook
- Instagram
- Twitter
- I do not have social media
- Other: \_\_\_\_\_

4. Have you used social media to learn about orthopaedic surgery residency programs prior to applying?

*Mark only one oval.*

- Yes
- No
- Prefer not to answer

5. Do you follow orthopaedic surgery residencies on social media, and if so how many? (If you follow one program on instagram, facebook, and twitter only count this as 1 residency)

*Mark only one oval.*

- I do not have social media
- I do have social media, but do not follow any residencies
- 1-5 residencies
- 6-10 residencies
- 11-15 residencies
- 16-20 residencies
- 20+ residencies

6. Has an orthopaedic surgery residency ever posted anything on social media that diminished your interest in that program?

*Mark only one oval.*

- Yes
- No
- Prefer not to answer

7. Has an orthopaedic surgery residency ever posted anything on social media that increased your interest in that program?

*Mark only one oval.*

- Yes
- No
- Prefer not to answer

8. Have you ever made a decision to apply to a program based on what they posted on social media?

*Mark only one oval.*

- Yes
- No
- Prefer not to answer

9. Have you ever made a decision to NOT apply to a program based on what they posted on social media?

*Mark only one oval.*

- Yes
- No
- Prefer not to answer

10. What types of posts have made the greatest impression on you as a student?  
Please check your top 3 that apply.

*Check all that apply.*

- Meet the residents, and posts about residents.
- Meet the attendings, and posts about attendings.
- Posts about didactics.
- Posts about cases.
- Operative room pictures.
- Posts about life outside of residency.
- None of the above

11. Have you ever contacted a program from information provided by their social media accounts, or by messaging their social media account?

*Mark only one oval.*

- Yes
- No
- Prefer not to answer

12. Have you gained valuable information from personally reaching out to a programs social media account?

*Mark only one oval.*

- Yes
- No
- Prefer not to answer

13. Did you attend an open house, educational session or information session hosted by a residency after learning about the opportunity through social medial account?

*Mark only one oval.*

- Yes
- No
- Prefer not to answer

14. How many orthopaedic surgery program virtual open houses or information sessions have you attended this year?

*Mark only one oval.*

- 0
- 1-5
- 6-10
- 10+
- Prefer not to answer.

15. How many orthopaedic surgery program didactic sessions (virtual or in person) have you attended this year?

*Mark only one oval.*

- 0
- 1-5
- 6-10
- 10+
- Prefer not to answer.

16. Do you think orthopaedic surgery programs should have social media accounts?

*Mark only one oval.*

- Yes
- No
- Prefer not to answer

17. Which social media accounts should orthopaedic surgery programs utilize? Check all that apply.

*Check all that apply.*

- Facebook
- Instagram
- Twitter
- Prefer not to answer

Other:  \_\_\_\_\_

18. What social media platform provides you the most benefit in regards to positioning yourself for success in obtaining an orthopaedic residency spot (networking, education, fun content, keeping you in the loop w/ open houses and educational sessions)?

*Check all that apply.*

- Facebook  
 Instagram  
 Twitter  
 Prefer not to answer  
 I do not use social media for this purpose

Other:  \_\_\_\_\_

19. Do you follow any orthopaedic surgery journals on social media? If so how many?

*Mark only one oval.*

- 0  
 1-5  
 6-10  
 10+  
 Prefer not to answer.

20. Do you follow any orthopaedic professional associations on social media? If so how many? (such as AAOS, AOA, POSNA, AAHKS etc)

*Mark only one oval.*

- 0  
 1-5  
 6-10  
 10+  
 Prefer not to answer.

21. Do you follow any orthopaedic surgery industry companies on social media? If so how many? (Depuy, Arthrex, Synthes, DJO, etc)

*Mark only one oval.*

- 0
- 1-5
- 6-10
- 10+
- Prefer not to answer.

22. Do you follow any hashtags or trending topics to follow posts about your areas of interest (#arthroscopy, #footandankle, #trauma #orthotwitter)?

*Mark only one oval.*

- Yes
- No
- Prefer not to answer

23. Do you follow any orthopaedic surgery influencer accounts on social media?

*Mark only one oval.*

- Yes
- No
- Prefer not to answer

24. Which orthopaedic social media influencers would you be most likely to recommend because of their valuable content?

---



25. Did COVID -19 influence the number of orthopaedic surgery programs you follow on social media?

*Mark only one oval.*

- Yes, increased the number of orthopaedic surgery programs I follow
- Yes, decreased the number of orthopaedic surgery programs I follow
- No, did not influence my social media following of orthopaedic surgery programs
- Prefer not to answer

26. In your opinion did COVID-19 result in more orthopaedic surgery programs starting social media accounts?

*Mark only one oval.*

- Yes
- No
- Prefer not to answer
- Unknown

---

This content is neither created nor endorsed by Google.

Google Forms
